# Supplementary material for: First Demonstration of Clinical Fusarium Strains Causing Cross-Kingdom Infections from Humans to Plants
Source: MDPI journal article supplement (doi:10.3390/microorganisms8060947), 2020-06-23

**A**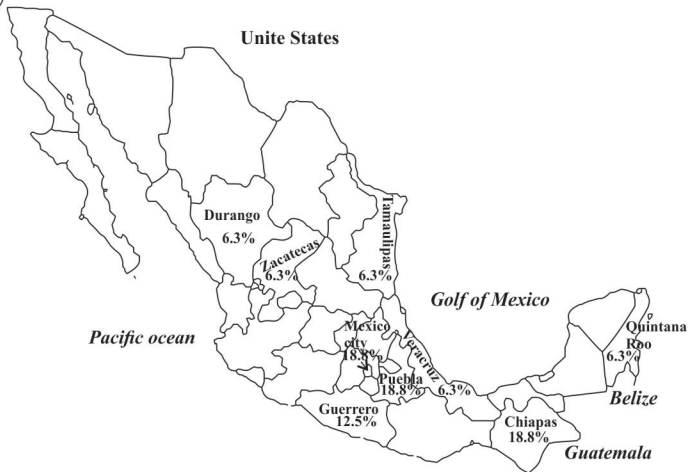**B**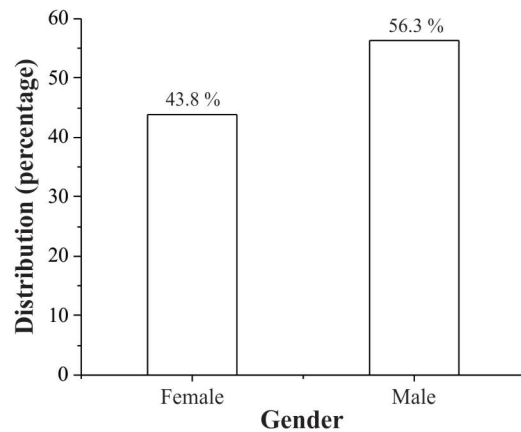**C**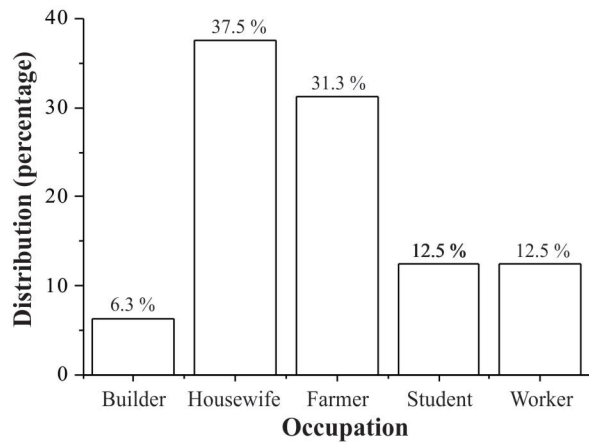**D**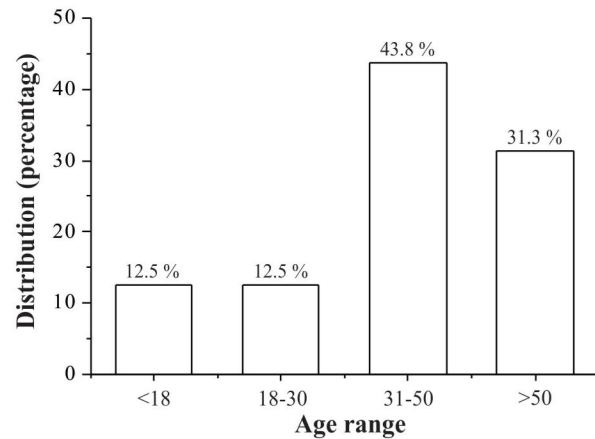

Supplement: s1 [file s1]
